# Supplementary material for: A highly efficient Ni–Mo bimetallic hydrogen evolution catalyst derived from a molybdate incorporated Ni-MOF
Source: Royal Society of Chemistry journal article supplement (doi:10.1039/c8ta01325j), 2018-01-01
Supplement: c8ta01325j1.pdf [file c8ta01325j1.pdf]

## Electronic Supplementary Information

### A highly efficient Ni-Mo bimetallic hydrogen evolution catalyst derived from a molybdate incorporated Ni-MOF

Teng Wang,<sup>a</sup> Rumei Jin,<sup>a</sup> Xiuqi Wu,<sup>a</sup> Jie Zheng,<sup>\*a</sup> Xingguo Li<sup>\*a</sup> and Kostya Ostrikov<sup>b,c</sup>

<sup>a</sup>Beijing National Laboratory for Molecular Sciences (BNLMS), College of Chemistry and Molecular Engineering, Peking University, Beijing 100871, China. \*E-mail: zhengjie@pku.edu.cn, xgli@pku.edu.cn

<sup>b</sup>Institute for Future Environments and Institute for Health and Biomedical Innovation, School of Chemistry, Physics and Mechanical Engineering, Queensland University of Technology, Brisbane, Queensland 4000, Australia.

<sup>c</sup>CSIRO – QUT Joint Sustainable Processes and Devices Laboratory, P. O. Box 218, Lindfield, NSW, Australia.

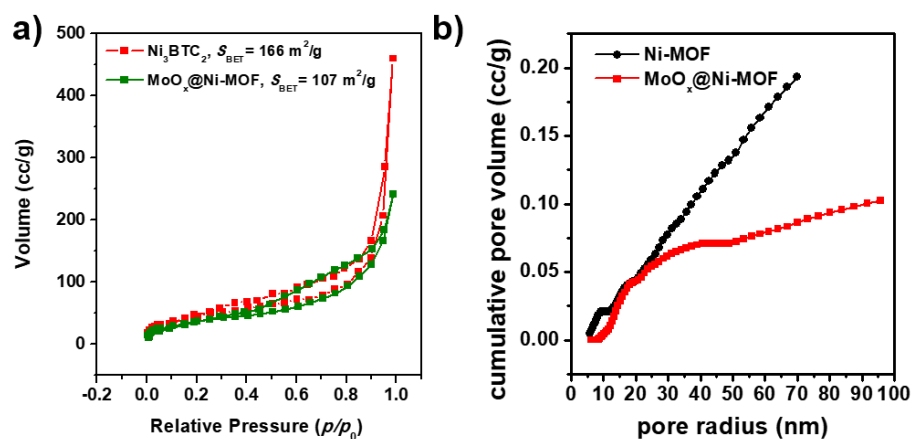

Figure S1. (a) Nitrogen sorption isotherms and (b) cumulative pore volume-size curve of MoO<sub>x</sub>@Ni-MOF and Ni-MOF.

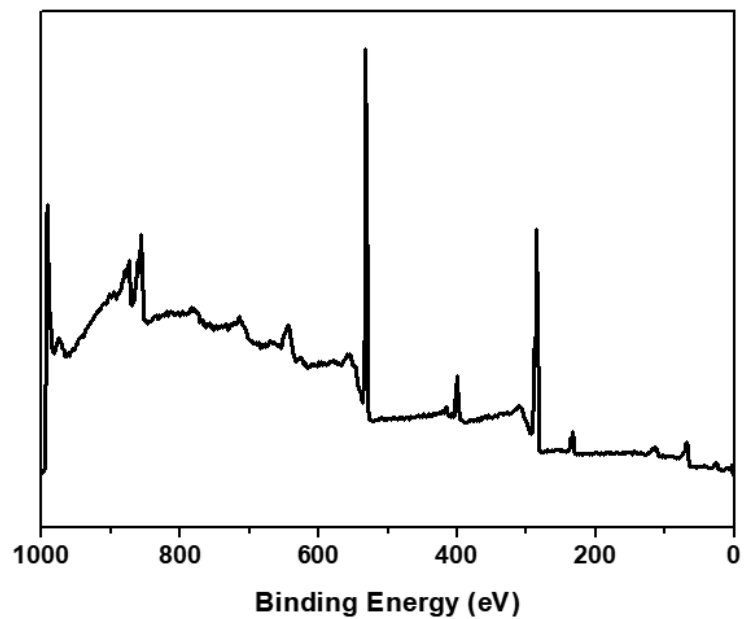

Figure S2. Full-range XPS spectra of molybdate incorporated Ni-MOF (Mo:Ni molar ratio= 6:94)

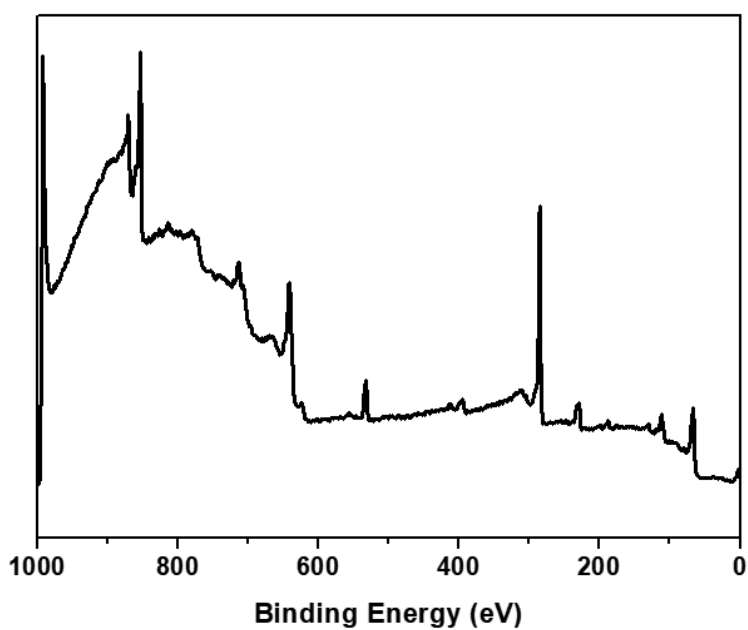

Figure S3. Full-range XPS spectra of NiMo-C sample.

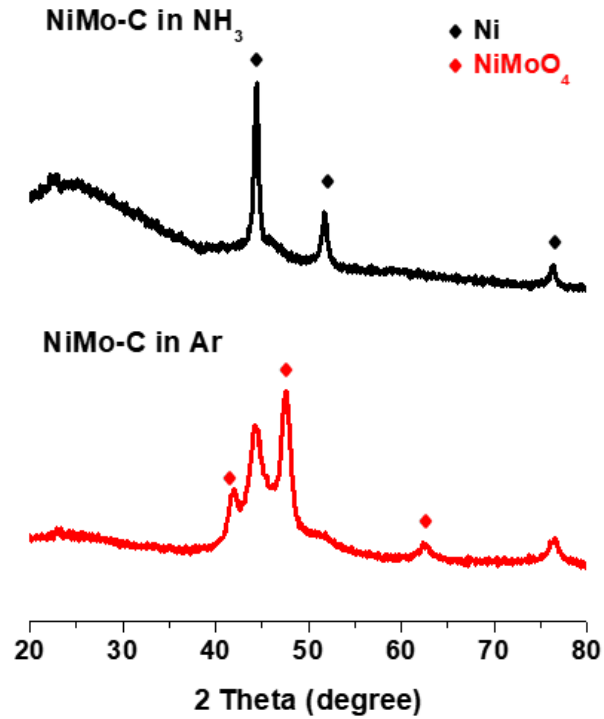

Figure S4. XRD patterns of the NiMo-C heated in NH<sub>3</sub> and Ar respectively.

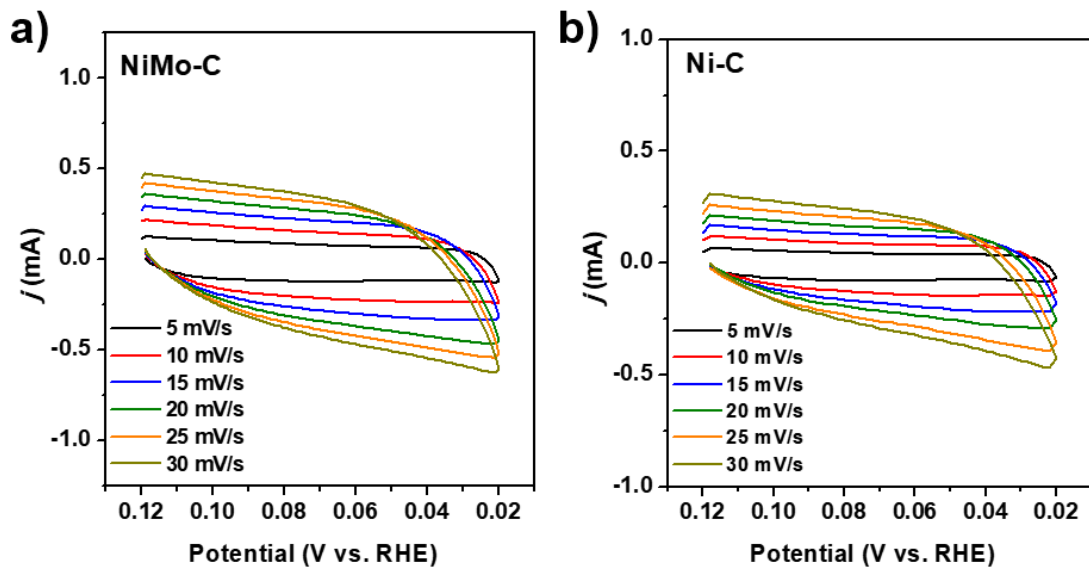

Figure S5 Cyclic voltammetry tests in region without hydrogen evolution with different scan rates to determine the electrochemical double layer capacitance ( $C_{dl}$ ) of (a) NiMo-C and (b) Ni-C.

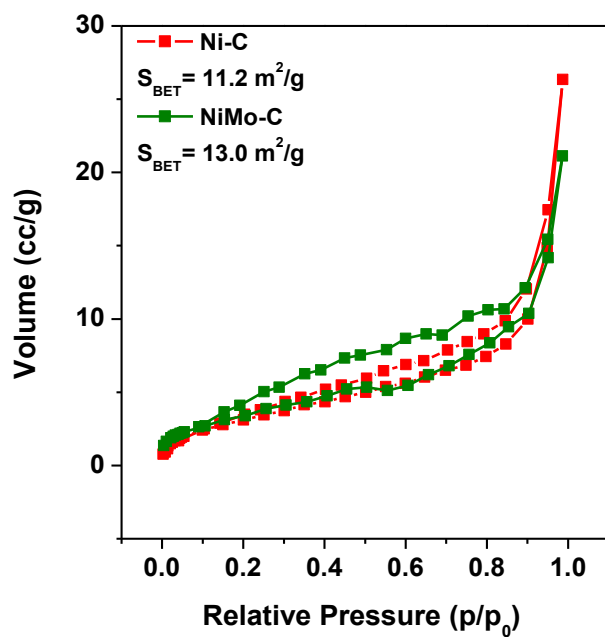

Figure S6. Nitrogen sorption isotherms of Ni-C and NiMo-C. Surface area from BET method is calculated.

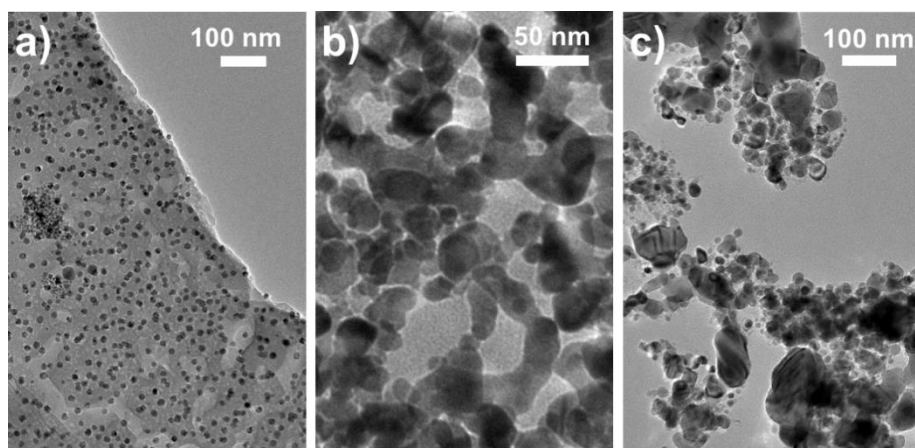

Figure S7. TEM images of the NiMo-C yielded from different temperature: a) 350 °C b) 550 °C and c) 650 °C.

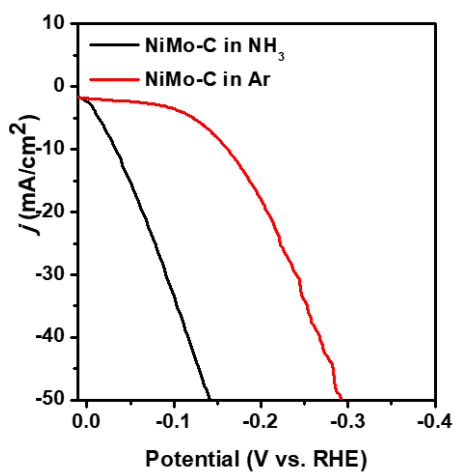

Figure S8. LSV curves in 1 M KOH of the NiMo-C heated in  $\text{NH}_3$  and Ar respectively.

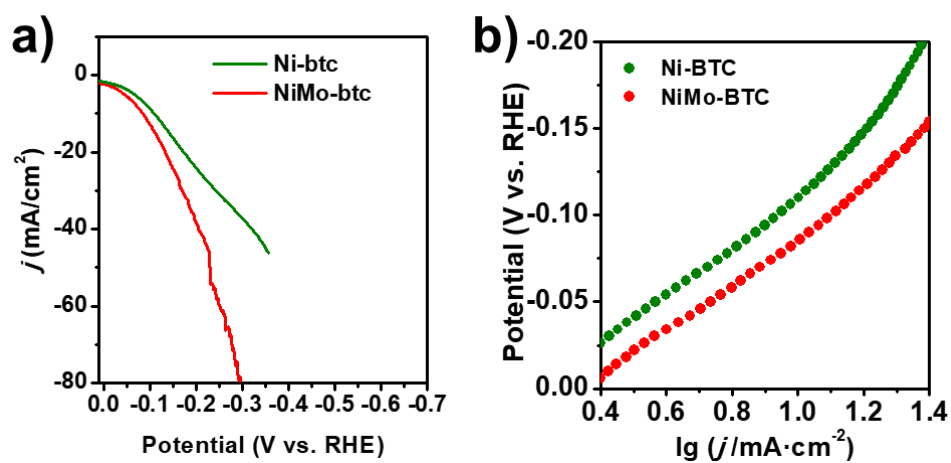

Figure S9. (a) LSV curves and (b) Tafel plots in 0.5 M  $\text{H}_2\text{SO}_4$  of the NiMo-C and Ni-C.

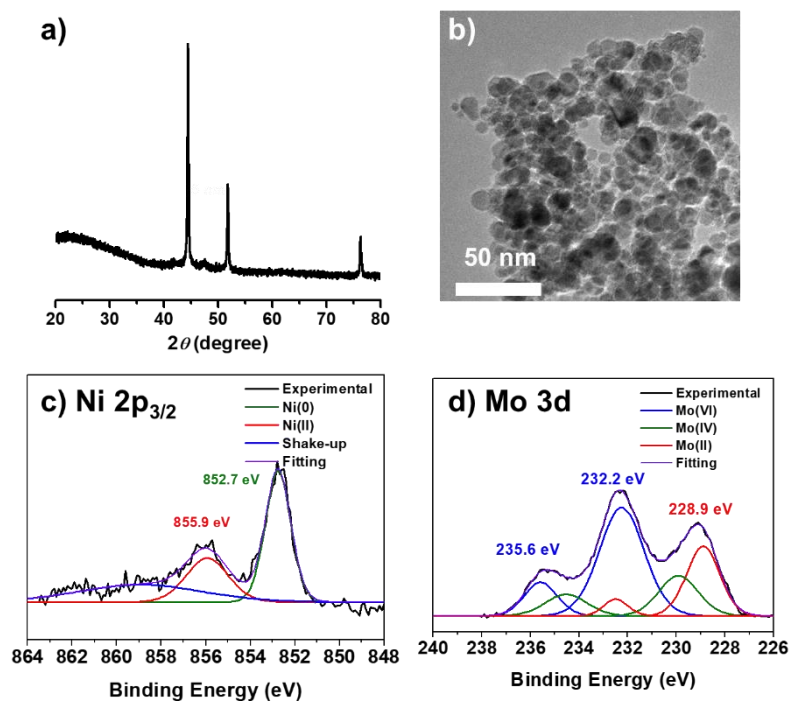

Figure S10. Structure characterization of the NiMo-C catalyst after galvanostatic test in Figure 5a: (a) the XRD pattern (b) TEM image, (c-d) XPS spectra in Ni  $2p_{3/2}$  and Mo 3d region.

Table S1 Summary of the HER catalytic activity of representative metal-carbon nanocomposites in alkaline solutions

| Catalyst                         | Electrolyte | Loading (mg/cm <sup>2</sup> ) | $\eta$ (mV) | $j$ (mA·cm <sup>-2</sup> ) | Ref.      |
|----------------------------------|-------------|-------------------------------|-------------|----------------------------|-----------|
| <b>MOF-derived NiMo-C</b>        | 1M KOH      | 2                             | 58          | 20                         | This work |
| <b>MOF-derived Ni-C</b>          | 1M KOH      | 2                             | 111         | 20                         | This work |
| Ni-Mo nanopowders                | 1M KOH      | 2                             | 80          | 20                         | 1         |
| MoC <sub>x</sub> nano octahedron | 1M KOH      | 0.8                           | 151         | 10                         | 2         |
| Mo <sub>x</sub> C-Ni@NCV         | 1 M KOH     | 1.1                           | 126         | 10                         | 3         |
| NiMoN@carbon cloth               | 1 M KOH     | 2.5                           | 109         | 10                         | 4         |
| NanoMoC@GS                       | 1 M KOH     | 0.76                          | 77          | 10                         | 5         |
| Ni/NiO@ MWCNTs                   | 1M KOH      | 0.28<br>8                     | 80<br>95    | 10<br>100                  | 6         |

1. J. R. McKone, B. F. Sadtler, C. A. Werlang, N. S. Lewis and H. B. Gray, *ACS Catal.*, 2013, **3**, 166-169.
2. H. B. Wu, B. Y. Xia, L. Yu, X. Y. Yu and X. W. Lou, *Nat. Commun.*, 2015, **6**, 6512.
3. S. Wang, J. Wang, M. Zhu, X. Bao, B. Xiao, D. Su, H. Li and Y. Wang, *J. Am. Chem. Soc.* 2015, **137**, 15753-15759.

4. Y. Zhang, B. Ouyang, J. Xu, S. Chen, R. S. Rawat and H. J. Fan, *Adv. Energy Mater.*, 2016, **6**, 1600221.
5. Z. Shi, Y. Wang, H. Lin, H. Zhang, M. Shen, S. Xie, Y. Zhang, Q. Gao and Y. Tang, *J. Mater. Chem. A*, 2016, **4**, 6006-6013.
6. M. Gong, W. Zhou, M. C. Tsai, J. Zhou, M. Guan, M. C. Lin, B. Zhang, Y. Hu, D. Y. Wang, J. Yang, S. J. Pennycook, B. J. Hwang and H. Dai, *Nat. Commun.*, 2014, **5**, 4695.
